# Supplementary material for: Tablet Formulation of 2-((3-(Chloromethyl)benzoyl)oxy)benzoic Acid by Linear and Quadratic Models
Source: PubMed Central journal article supplement — ACS Omega. 2022 Sep 12;7(38):34045–53. doi: 10.1021/acsomega.2c03147 (PMC9520729; doi:10.1021/acsomega.2c03147), 2022-09-12
Supplement: ao2c03147_si_001.pdf [file ao2c03147_si_001.pdf]

## Supporting Information

### Tablet formulation of 2-((3-(chloromethyl)benzoyl)oxy)benzoic acid by linear and quadratic models

Wuryanto Hadinugroho\*, Kuncoro Foe, Yudy Tjahjono, Caroline Caroline, Senny Yesery Esar,  
Hendy Wijaya, Maria Annabella Jessica

Department of Pharmaceutical, Faculty of Pharmacy, Widya Mandala Surabaya Catholic  
University, Kalisari Selatan no. 1 Pakuwon City, Surabaya, Indonesia

| <b>Number of Chapter/Table/Figure</b> | <b>Title</b>                                                                   |
|---------------------------------------|--------------------------------------------------------------------------------|
| Chapter S1                            | Tablet Dosage Calculation                                                      |
| Table S1                              | Statistical analysis of 3CH <sub>2</sub> Cl tablets                            |
| Table S2                              | The release of 3CH <sub>2</sub> Cl from the tablets                            |
| Figure S1                             | The kinetics profile of the release of 3CH <sub>2</sub> Cl from TA tablets     |
| Figure S2                             | The kinetics profile of the release of 3CH <sub>2</sub> Cl from TB tablets     |
| Figure S3                             | The kinetics profile of the release of 3CH <sub>2</sub> Cl from TC tablets     |
| Figure S4                             | The kinetics profile of the release of 3CH <sub>2</sub> Cl from T Opt. tablets |

## Chapter S1. Tablet Dosage Calculation

Data on 3CH<sub>2</sub>Cl based on pharmacokinetic experiments on rats were plasma drug concentration (C<sub>p</sub>) = 0.57 g/mL; volume of distribution (V<sub>d</sub>) = 7200 mL; elimination constant (K<sub>el</sub>) = 0.0003/hour; and bioavailability (F) = 0.8.

$$\text{Amount of drug in the body (A)} = C_p \times V_d = 0.57 \text{ g/mL} \times 7200 \text{ mL} = 4104 \text{ g} = 4.104 \text{ mg}$$

$$\text{Rate out} = K_{el} \times A = 0.0003 \text{ hours}^{-1} \times 4.104 \text{ mg} = 0.0012 \text{ mg/hour}$$

$$\text{Release rate} = \text{Rate out} / F = 0.0012 \text{ mg/hour} / 0.8 = 0.0015 \text{ mg/hour}$$

The drug preparation is designed to release the drug for 8 hours

$$\text{Maintenance dose (DM)} = \text{Release rate} \times 8 \text{ hours} = 0.0015 \text{ mg/hour} \times 8 \text{ hours} = 0.0123 \text{ mg}$$

$$\text{Load dose (LD)} = A/F = 4.104 \text{ mg} / 0.8 = 5.13 \text{ mg}$$

$$\text{Total dose} = \text{DM} + \text{LD} = 0.0123 \text{ mg} + 5.13 \text{ mg} = 5.1423 \text{ mg (rat dose 200 g)}$$

$$\text{Human dose (DH)} = \text{Rat dose} \times \text{conversion factor} = 5.1423 \text{ mg} \times 56 = 287.9695 \text{ mg} \approx 300 \text{ mg}$$

**Table S1.** Statistical analysis of 3CH<sub>2</sub>Cl tablets

| <b>ANOVA</b>   | <b>Flow time</b> | <b>Carr index</b> | <b>Hardness</b> | <b>Friability</b> | <b>Disintegrating time</b> | <b>Drug release</b> |
|----------------|------------------|-------------------|-----------------|-------------------|----------------------------|---------------------|
| R-Squared      | 0.9897           | 0.9868            | 0.9857          | 0.9932            | 0.9908                     | 0.9896              |
| Adj R-Squared  | 0.9795           | 0.9737            | 0.9715          | 0.9865            | 0.9817                     | 0.9792              |
| Pred R-Squared | 0.8613           | 0.8224            | 0.8075          | 0.9088            | 0.8761                     | 0.8597              |
| Adeq Precision | 17.0000          | 15.0000           | 14.4000         | 21.0000           | 18.0000                    | 16.9000             |

The coefficient of the polynomial equation of the linear model is accepted if the difference between R-Square and Pred R-Square is less than 0.2 and Adeq Precision is more than 4.

**Table S2.** The release of 3CH<sub>2</sub>Cl from the tablets

| t [min.] | TA    |      | TB    |      | TC    |      | T Opt. |      |
|----------|-------|------|-------|------|-------|------|--------|------|
|          | [%]   | SD   | [%]   | [%]  | [%]   | SD   | [%]    | SD   |
| 0        | 0.00  | 0.00 | 0.00  | 0.00 | 0.00  | 0.00 | 0.00   | 0.00 |
| 10       | 26.54 | 1.12 | 28.74 | 1.93 | 39.18 | 1.06 | 34.29  | 0.97 |
| 20       | 41.29 | 0.88 | 42.34 | 1.39 | 56.24 | 1.80 | 51.51  | 0.82 |
| 30       | 50.40 | 0.22 | 51.53 | 1.57 | 67.64 | 1.81 | 63.73  | 1.01 |
| 45       | 54.74 | 1.07 | 60.62 | 1.50 | 76.25 | 1.25 | 73.31  | 0.82 |
| 60       | 59.41 | 0.95 | 69.95 | 1.00 | 85.04 | 1.05 | 81.53  | 0.86 |

The release of 3CH<sub>2</sub>Cl from tablets contains SLS [%] and CS [%]: TA (0.50:4.00), TB (0.75:3.00), TC (1.00:2.00), and and T Opt. (0.92:2.33).

The release kinetics of 3CH<sub>2</sub>Cl from tablets for each formula was based on the similarity of the observed point profile to the predicted line profile using DDSolver software (Figure S1-S4).

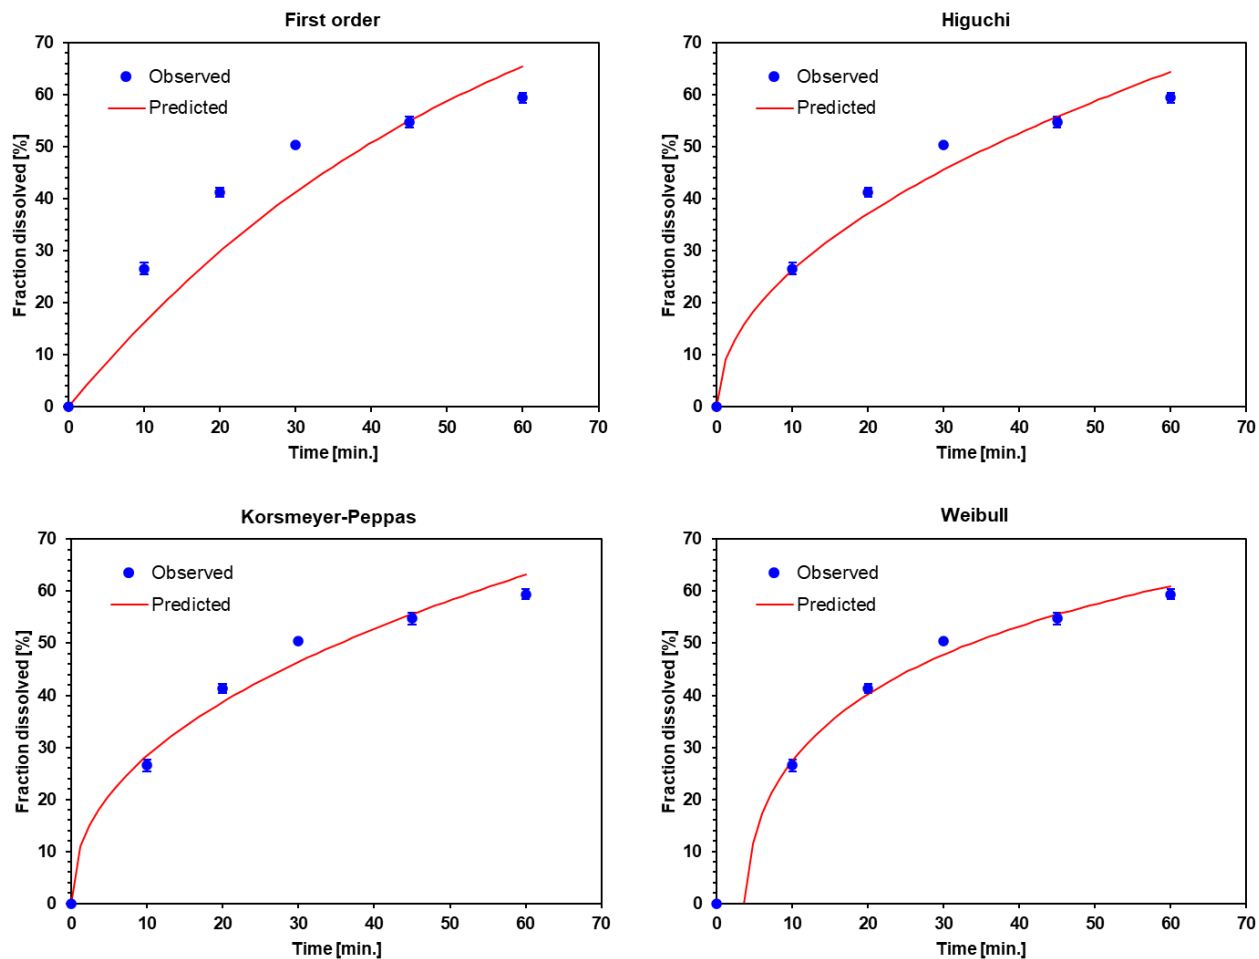

**Figure S1.** The kinetics profile of the release of 3CH<sub>2</sub>Cl from TA tablets with various model kinetic. Based on the profile, the observation point is most similar to the Weibull model prediction line with a value of Rsqr\_adj 0.9907; MSE\_root 2.0408; and AIC 20.5635.

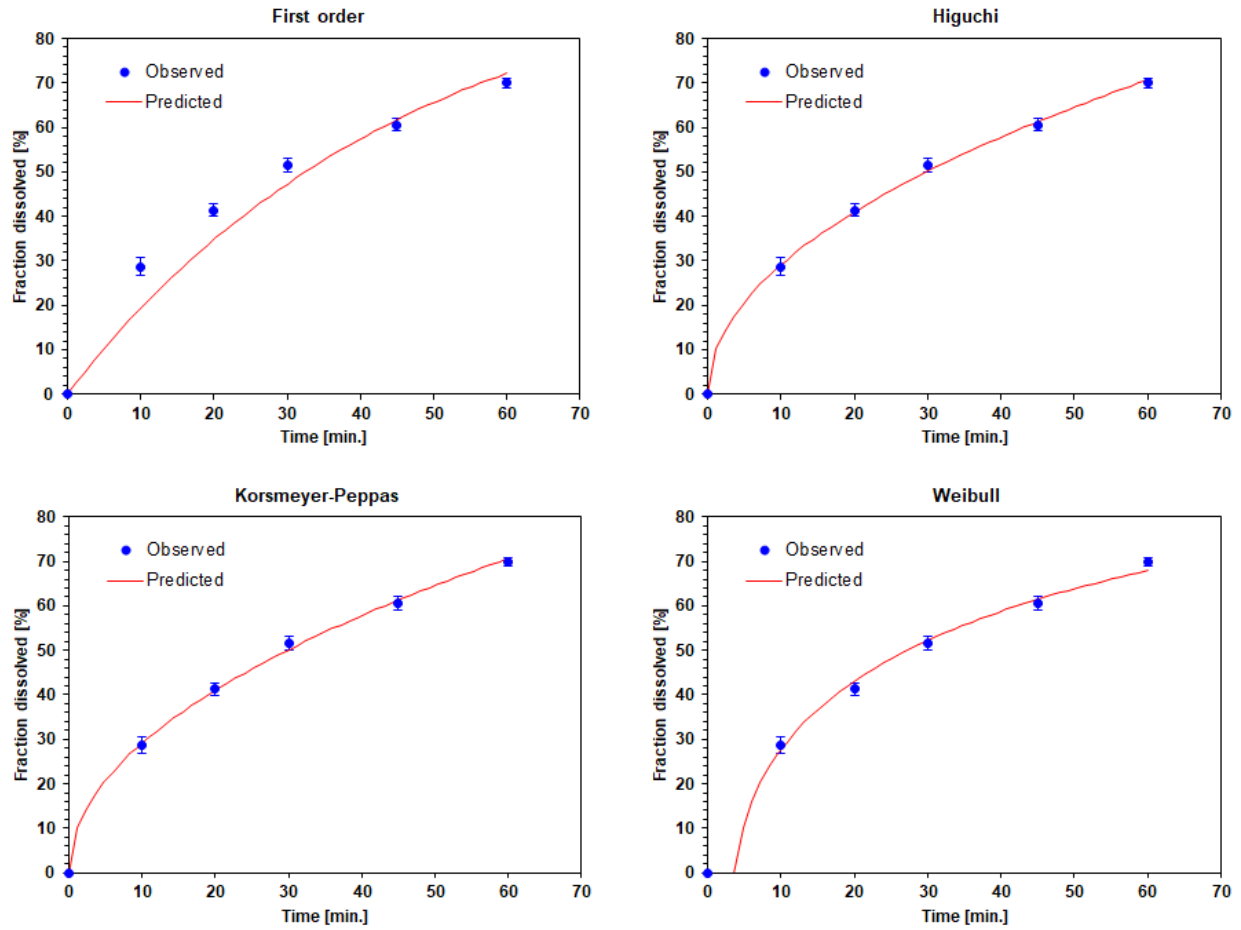

**Figure S2.** The kinetics profile of the release of 3CH<sub>2</sub>Cl from TB tablets with various model kinetic. Based on the profile, the point of observation is most similar to the Higuchi model prediction line with a value of Rsqr\_adj 0.9966; MSE\_root 1.4227; and AIC 15.3644.

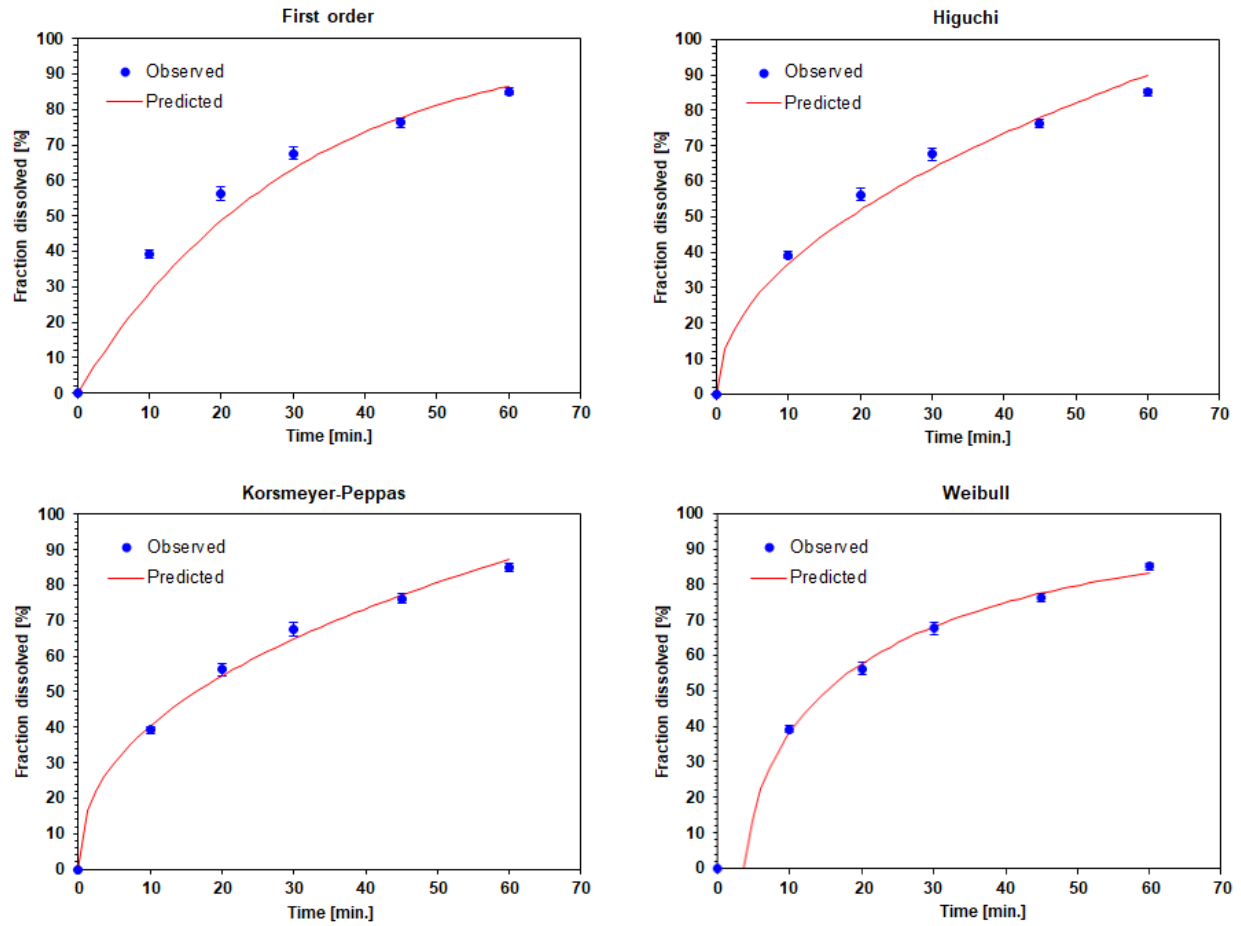

**Figure S3.** The kinetics profile of the release of 3CH<sub>2</sub>Cl from TC tablets with various model kinetic. Based on the profile, the point of observation is most similar to the Weibull model prediction line with a value of Rsqr\_adj 0.9963; MSE\_root 1.8553; and AIC 19.9178.

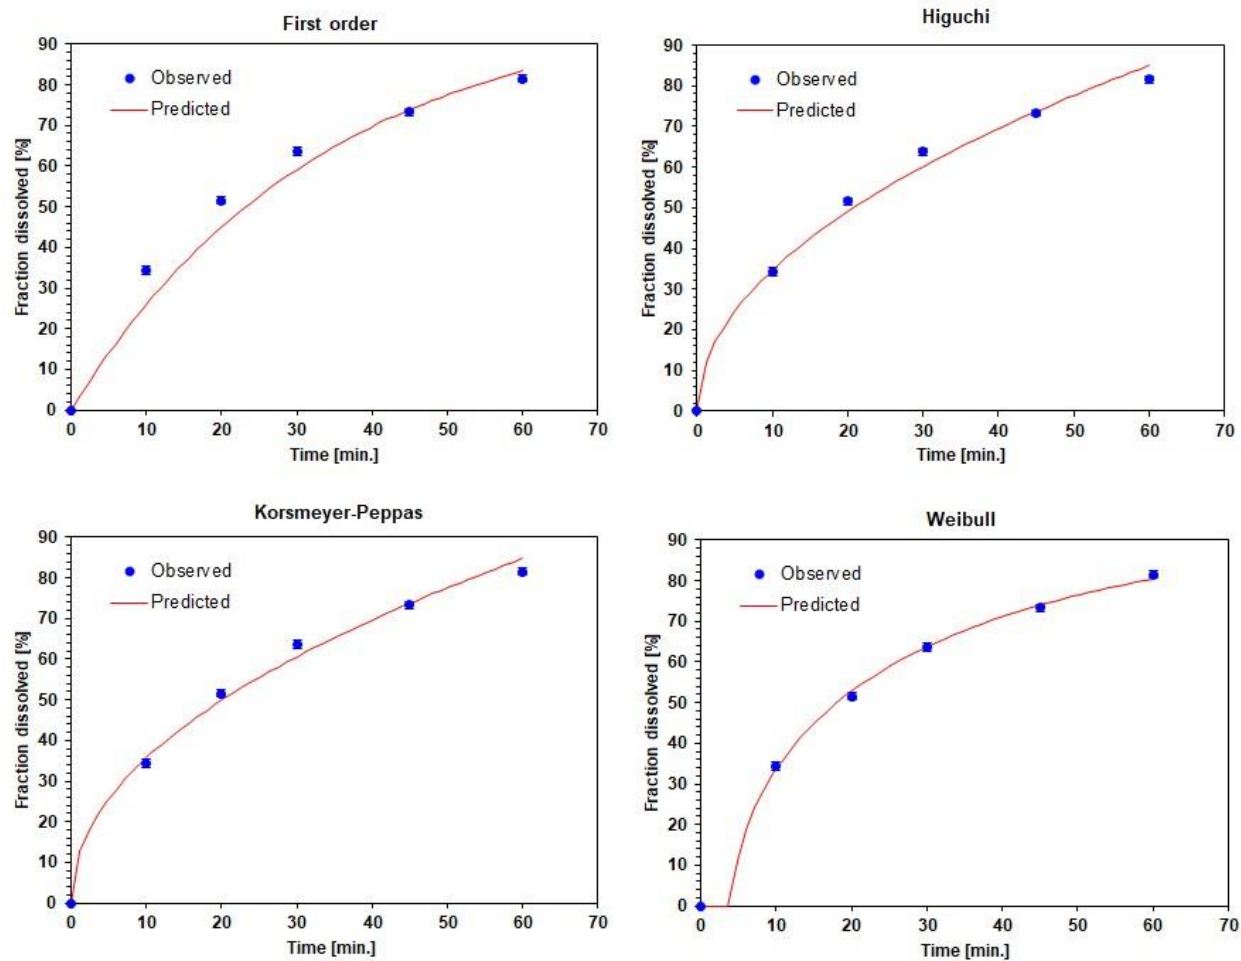

**Figure S4.** The kinetics profile of the release of 3CH<sub>2</sub>Cl from T Opt. tablets with various model kinetic. Based on the profile, the point of observation is most similar to the Higuchi model prediction line with a value of Rsqr\_adj 0.9979; MSE\_root 1.2986; and AIC 14.8858.
